# Supplementary material for: Nitrogen, phosphorus co-doped eave-like hierarchical porous carbon for efficient capacitive deionization
Source: Royal Society of Chemistry journal article supplement (doi:10.1039/d0ta10797b), 2021-01-01
Supplement: d0ta10797b1.pdf [file d0ta10797b1.pdf]

**Electronic supplementary information (ESI)**

**Nitrogen, Phosphorus Co-doped Eave-like Hierarchical Porous Carbon for Efficient Capacitive Deionization**

*Hao Zhang<sup>1</sup>, Chaohai Wang<sup>1</sup>, Wuxiang Zhang<sup>1</sup>, Ming Zhang<sup>1</sup>, Junwen Qi<sup>1</sup>, Jieshu Qian<sup>1</sup>, Xiuyun Sun<sup>1</sup>,*

*Brian Yulianto<sup>2,3</sup>, Jongbeom Na<sup>4</sup>, Teahoon Park<sup>5</sup>, Hassannien Gomaa Abdien Gomaa<sup>6</sup>, Yusuf Valentino*

*Kaneti<sup>4\*</sup>, Jin Woo Yi<sup>5\*</sup>, Yusuke Yamauchi<sup>4,7</sup>, Jiansheng Li<sup>1\*</sup>*

<sup>1</sup> Key Laboratory of Jiangsu Province for Chemical Pollution Control and Resources Reuse, School of Environmental and Biological Engineering, Nanjing University of Science and Technology, Nanjing 210094, China

<sup>2</sup> Advanced Functional Materials Laboratory, Department of Engineering Physics, Institute of Technology Bandung, Bandung 40132, Indonesia

<sup>3</sup> Research Center for Nanosciences and Nanotechnology (RCNN), Institute of Technology Bandung, Bandung 40132, Indonesia

<sup>4</sup> Australian Institute for Bioengineering and Nanotechnology (AIBN) and School of Chemical Engineering, The University of Queensland, Brisbane, Queensland 4072, Australia

<sup>5</sup> Carbon Composite Department, Composites Research Division, Korea Institute of Materials Science (KIMS), Changwon-si 51508, Gyeongsangnam-do, Republic of Korea

<sup>6</sup> Chemistry Department, Faculty of Science, Al-Azhar University, Assiut 71524, Egypt

<sup>7</sup> JST-ERATO Yamauchi Materials Space-Tectonics Project and International Research Center for Materials Nanoarchitectonics (WPI-MANA), National Institute for Materials Science (NIMS), Tsukuba, Ibaraki 305-0044, Japan

E-mails: v.kaneti@uq.edu.au; yjw0628@kims.re.kr; lijsh@njust.edu.cn

Table. S1. Structural parameters and elemental compositions of ZIF-8-C, N-EPC, and NP-EHPC.

| Sample      | $S_{\text{BET}}$<br>( $\text{m}^2$<br>$\text{g}^{-1}$ ) | $V_{\text{pore}}$<br>( $\text{cm}^3$<br>$\text{g}^{-1}$ ) | $V_{\text{micro}}$<br>( $\text{cm}^3$<br>$\text{g}^{-1}$ ) | $V_{\text{micro}}/V_{\text{pore}}$ | Elemental composition (%) |      |      |     | N/P<br>ratio |
|-------------|---------------------------------------------------------|-----------------------------------------------------------|------------------------------------------------------------|------------------------------------|---------------------------|------|------|-----|--------------|
|             |                                                         |                                                           |                                                            |                                    | C                         | O    | N    | P   |              |
| ZIF-8-C     | 1044.0                                                  | 0.49                                                      | 0.45                                                       | 0.92                               | 78.1                      | 6.8  | 15.1 | --  | --           |
| N-EPC       | 1065.7                                                  | 0.60                                                      | 0.28                                                       | 0.47                               | 84.5                      | 5.9  | 9.6  | --  | --           |
| NP-EHPC     | 1165.8                                                  | 0.72                                                      | 0.13                                                       | 0.18                               | 78.6                      | 16.8 | 2.9  | 1.7 | 1.71         |
| NP-EHPC-65  | 983.5                                                   | 0.66                                                      | 0.16                                                       | 0.24                               | 80.3                      | 10.9 | 5.7  | 3.1 | 1.84         |
| NP-EHPC-195 | 1155.5                                                  | 0.82                                                      | 0.18                                                       | 0.22                               | 82.1                      | 12.4 | 3.0  | 2.5 | 1.20         |

Table. S2.  $R_s$  and  $R_{\text{ct}}$  values of ZIF-8-C, N-EPC, and NP-EHPC electrodes.

| Sample  | $R_s$ ( $\Omega$ ) | $R_{\text{ct}}$ ( $\Omega$ ) |
|---------|--------------------|------------------------------|
| ZIF-8-C | 3.49               | 3.48                         |
| N-EPC   | 3.36               | 3.19                         |
| NP-EHPC | 2.92               | 1.65                         |

Table. S3. Comparison of desalination capacities of reported carbon materials.

| Electrode materials                                                   | Applied voltage (V) | Initial NaCl concentration (mg L <sup>-1</sup> ) | SAC (mg g <sup>-1</sup> ) | Cycle number | Ref.      |
|-----------------------------------------------------------------------|---------------------|--------------------------------------------------|---------------------------|--------------|-----------|
| Nitrogen-doped CNFA800                                                | 1.2                 | 500                                              | 14.3                      | 10 (~100%)   | 1         |
| Graphite reinforced-cellulose (GrC)                                   | 1.2                 | 500                                              | 13.1                      | 10 (~99%)    | 2         |
| ZIF-8@PZS-C                                                           | 1.2                 | 500                                              | 22.19                     | 20 (~98%)    | 3         |
| Graphene aerogel (GA)                                                 | 1.2                 | 500                                              | 9.9                       | /            | 4         |
| ZIF-67/PPy hybrid                                                     | 1.2                 | 584                                              | 11.34                     | 100 (~98%)   | 5         |
| Nitrogen-doped porous carbon tubes composite (PCT <sub>1.75</sub> -N) | 1.2                 | 500                                              | 16.7                      | 100 (92.5%)  | 6         |
| Nitrogen-doped carbon/rGO nano-sandwiches                             | 1.2                 | 589                                              | 17.52                     | 10 (~99%)    | 7         |
| Hierarchically porous 3D architectural graphene (GO-Mw-Hyd)           | 1.0                 | 500                                              | 4.79                      | 3 (~83%)     | 8         |
| Activated carbon                                                      | 1.0                 | 500                                              | 11.0                      | /            | 9         |
| Porous carbon fibers                                                  | 1.0                 | 500                                              | 30.4                      | 30 (~98%)    | 9         |
| Open and interconnected porous architectures (3DGA-OP)                | 1.2                 | 500                                              | 14.35                     | 15 (~99%)    | 10        |
| Nitrogen-doped activated carbon                                       | 1.2                 | 468                                              | 24.7                      | 100 (~40%)   | 11        |
| Iron-nitrogen-doped carbon nanoparticles                              | 1.2                 | 293                                              | 8                         | 200 (~68.7%) | 12        |
| Ordered microporous carbon                                            | 0.8                 | 2000                                             | 15.75                     | 200 (~50%)   | 13        |
| Sugarcane Biowaste-Derived Biochars                                   | 1.2                 | 600                                              | 21.8                      | 70 (~87%)    | 14        |
| NP-EHPC                                                               | 1.2                 | 500                                              | 24.14                     | 150 (~74%)   | This work |

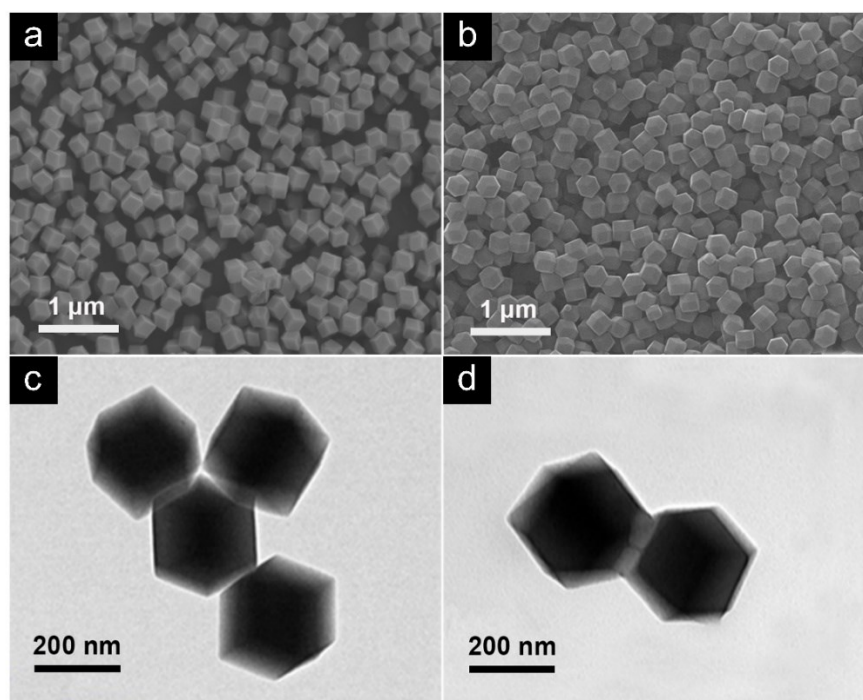

Fig. S1. SEM and TEM images of (a, c) ZIF-8 and (b, d) ZIF-8@AF.

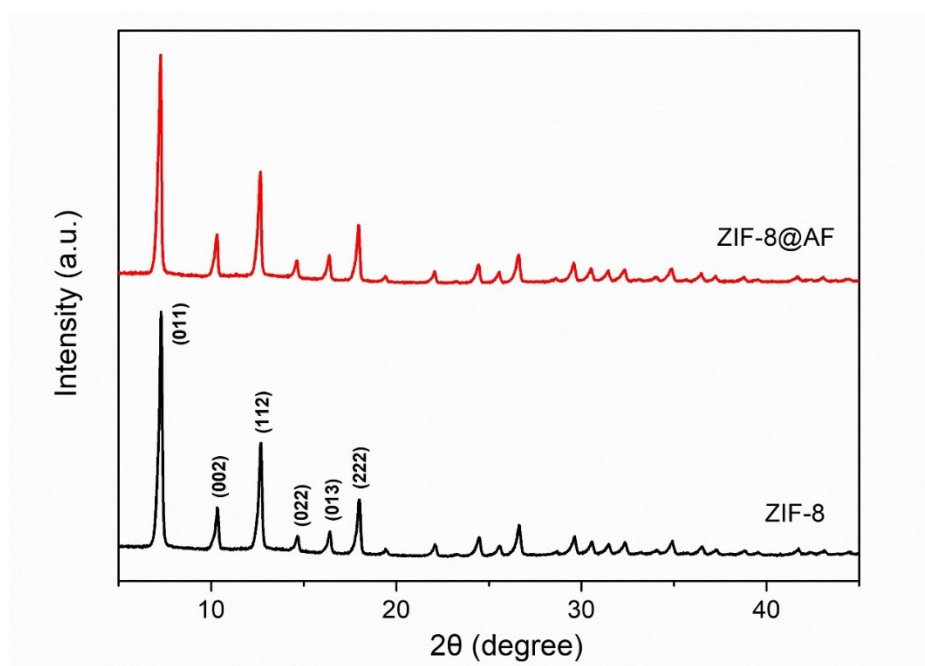

Fig. S2. XRD patterns of ZIF-8 and ZIF-8@AF.

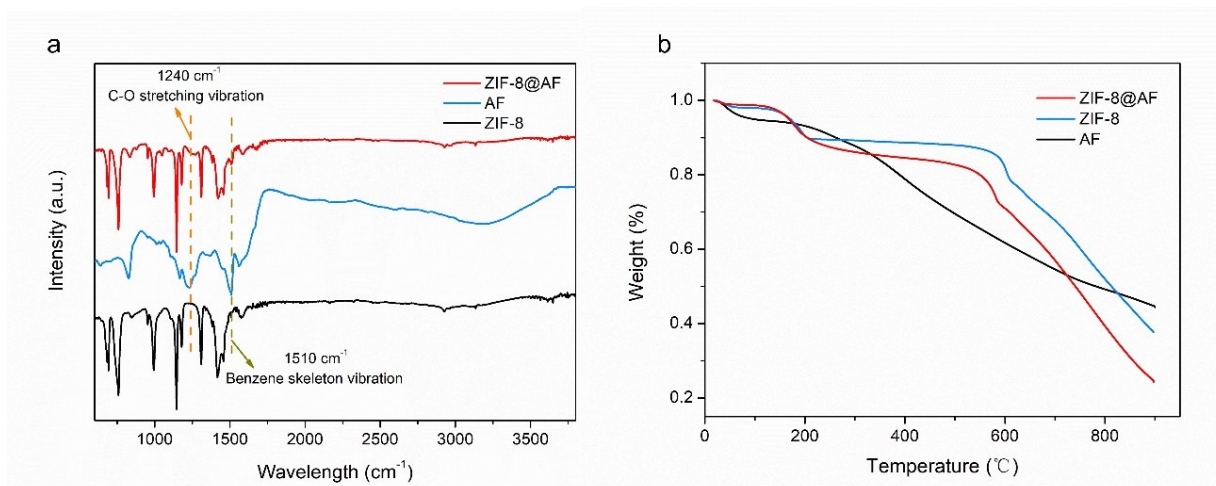

Fig. S3. (a) IR spectra of AF, ZIF-8, and ZIF-8@AF. (b) TG curves of AF, ZIF-8, and ZIF-8@AF in  $N_2$  atmosphere at a heating rate of  $5\text{ }^\circ\text{C min}^{-1}$ .

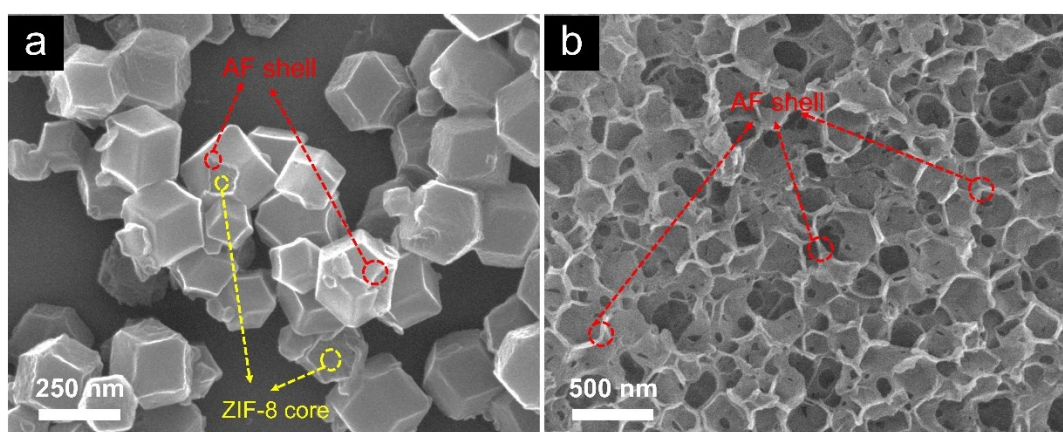

Fig. S4. SEM images of ZIF-8@AF after acid etching with (a)  $\text{pH} = 2$  and (b)  $\text{pH} = 1$ .

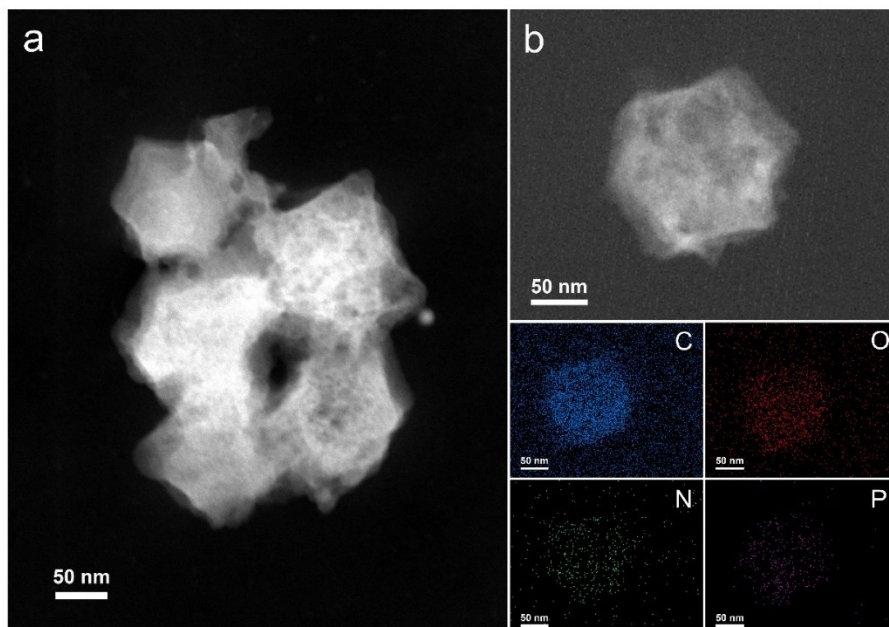

Fig. S5. (a) HAADF-STEM image and (b) the corresponding EDS elemental mapping of NP-EHPC.

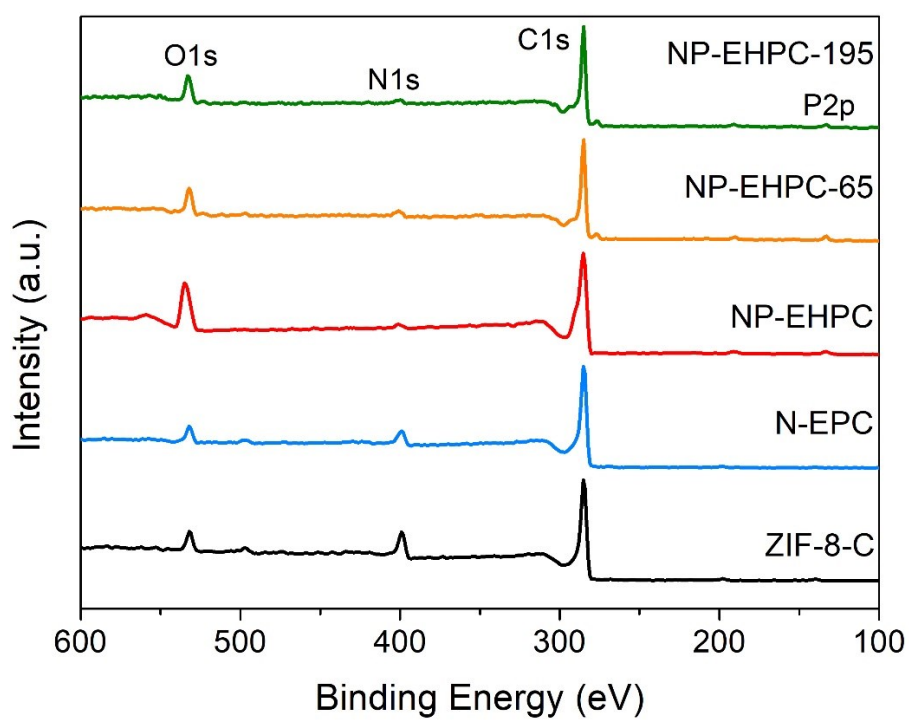

Fig. S6. XPS survey spectra of ZIF-8-C, N-EPC, NP-EHPC, NP-EHPC-65, and NP-EHPC-195.

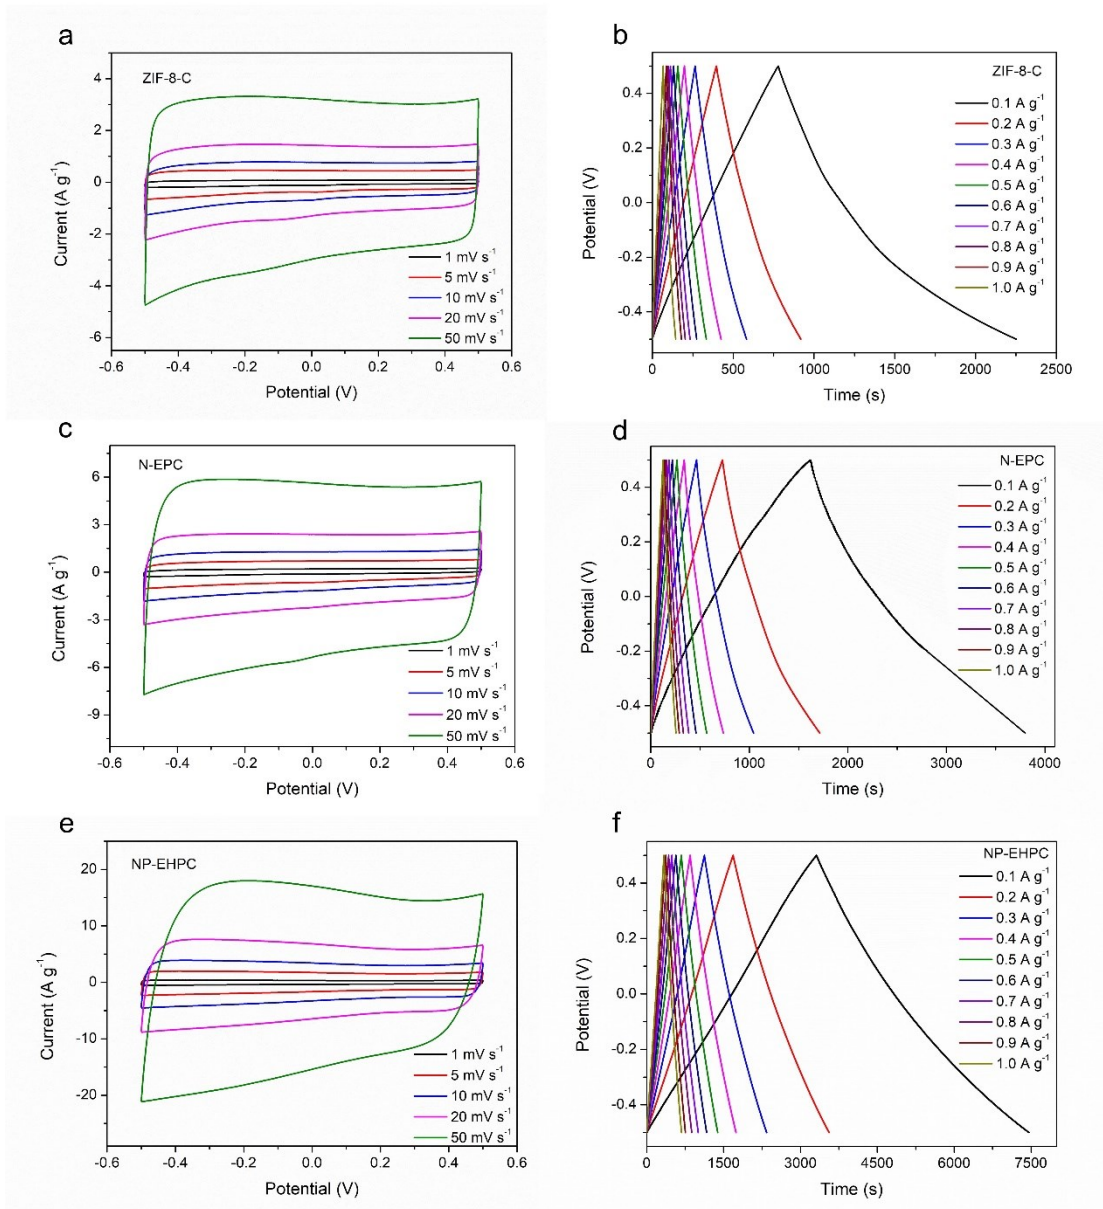

Fig. S7. CV curves and GCD plots of (a, b) ZIF-8-C, (c, d) N-EPC, and (e, f) NP-EHPC at different scan rates and current densities in 1 M NaCl solution.

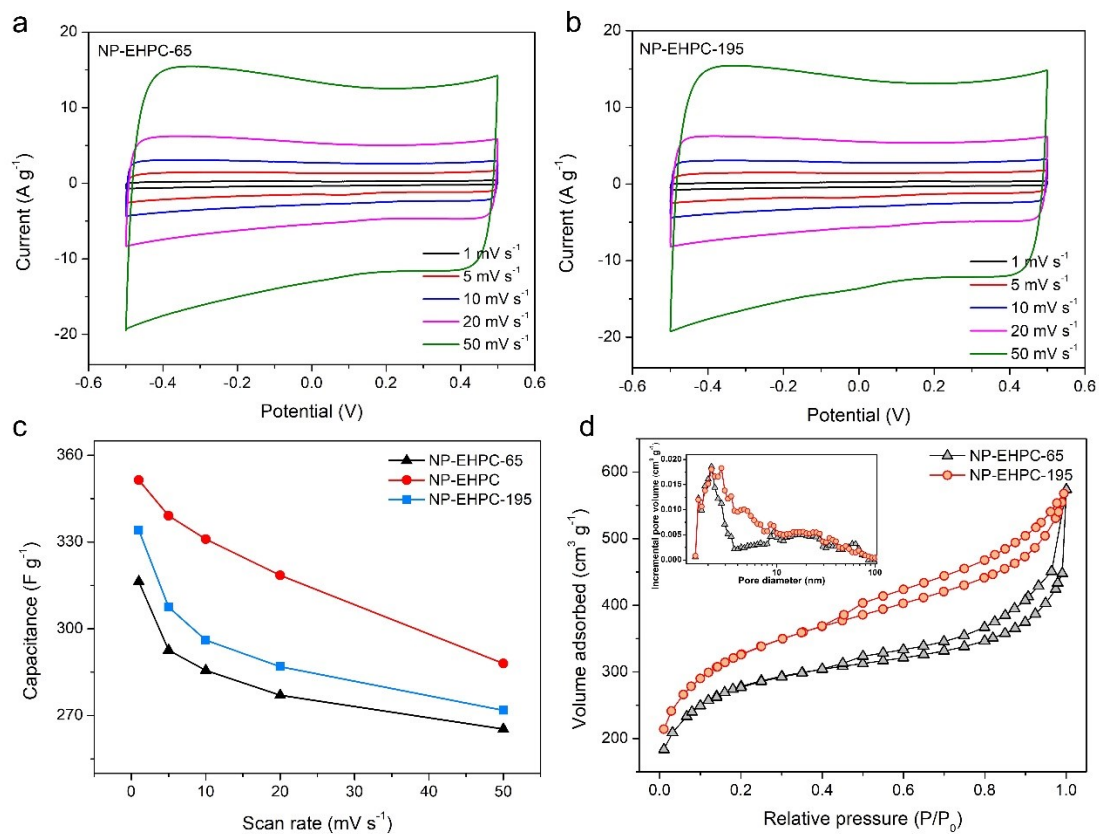

Fig. S8. CV curves of (a) NP-EHPC-65 and (b) NP-EHPC-195 at different scan rates in 1 M NaCl solution. (c) The specific capacitance values of NP-EHPC-65, NP-EHPC, and NP-EHPC-195 at different scan rates from 1 to 50  $\text{mV s}^{-1}$ . (d)  $\text{N}_2$  adsorption-desorption isotherms and pore diameter distribution curves (inset) of NP-EHPC-65 and NP-EHPC-195.



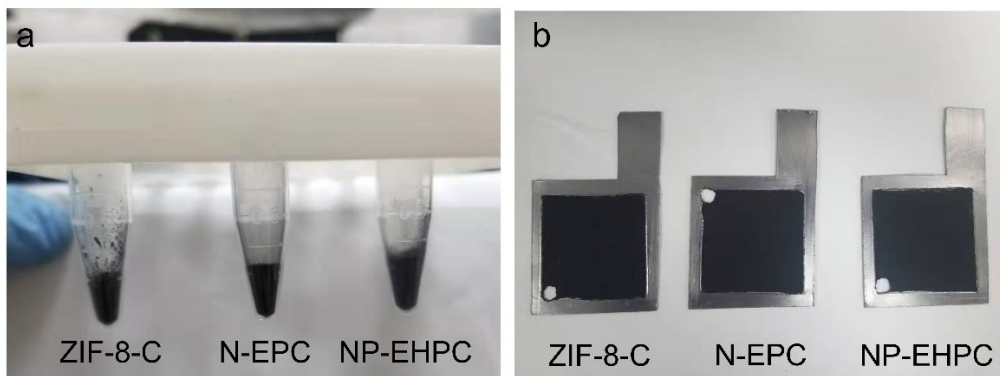

Fig. S9. Digital photographs of (a) ZIF-8, N-EPC, and NP-EHPC (50 mg each) and (b) the corresponding CDI electrodes fabricated from these materials (25 mg each).

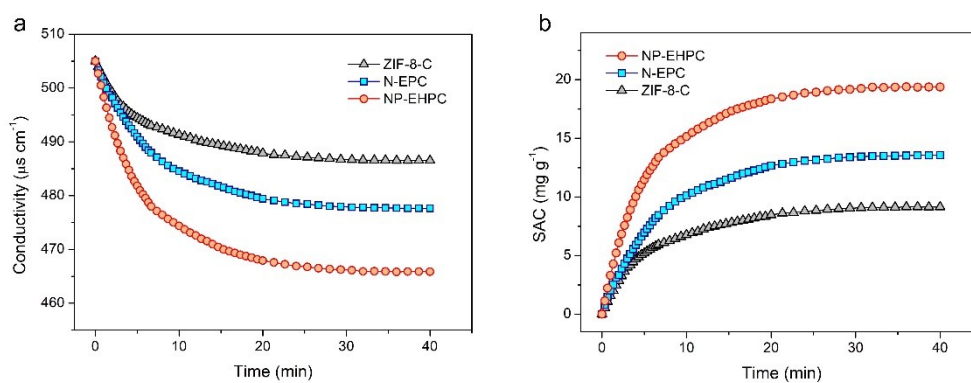

Fig. S10. (a) Conductivity profiles and (b) deionization capacities of ZIF-8-C, N-EPC, and NP-EHPC electrodes in  $250 \text{ mg L}^{-1}$  NaCl solutions at 1.2 V.

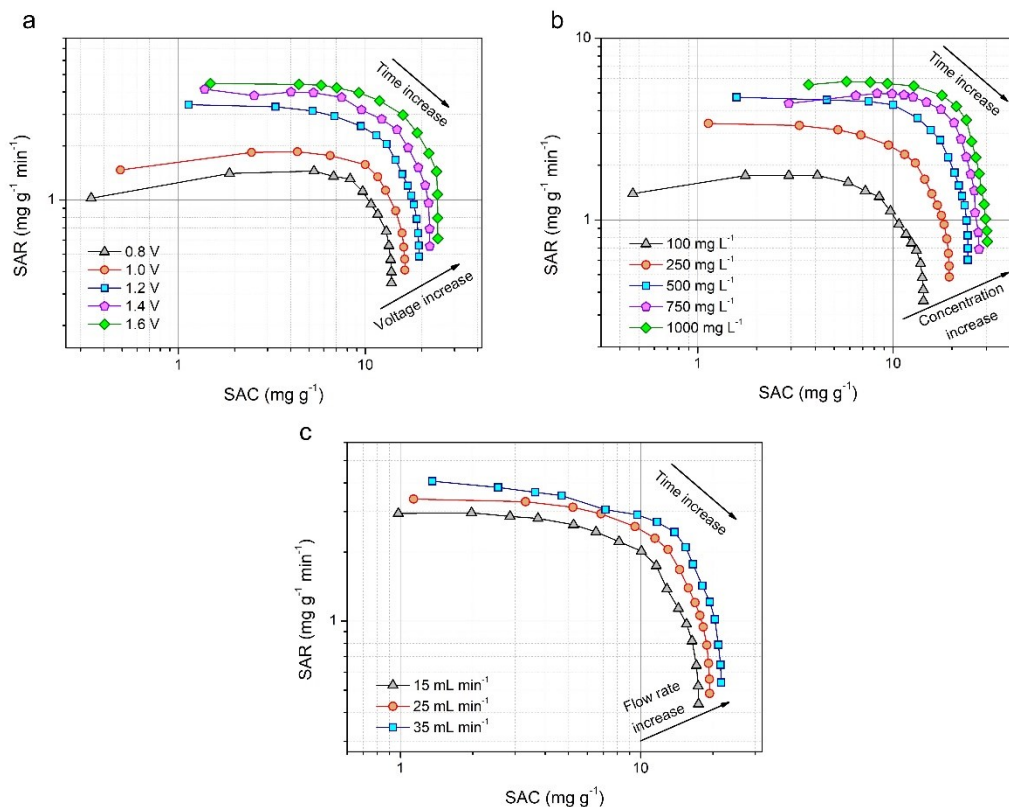

Fig. S11. CDI Ragone plots of the NP-EHPC electrode (a) at different applied voltage in  $250 \text{ mg L}^{-1}$  NaCl solution, (b) in different initial concentration of NaCl solution at  $1.2 \text{ V}$ , and (c) with different flow rate in  $250 \text{ mg L}^{-1}$  NaCl solution at  $1.2 \text{ V}$ .

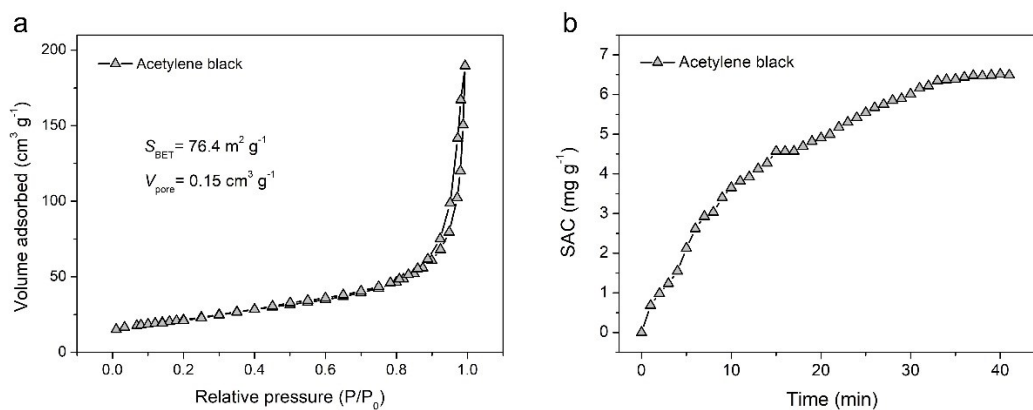

Fig. S12. (a)  $\text{N}_2$  adsorption-desorption isotherms of acetylene black. (b) Deionization capacities of acetylene black in  $500 \text{ mg L}^{-1}$  NaCl solutions at  $1.2 \text{ V}$ .

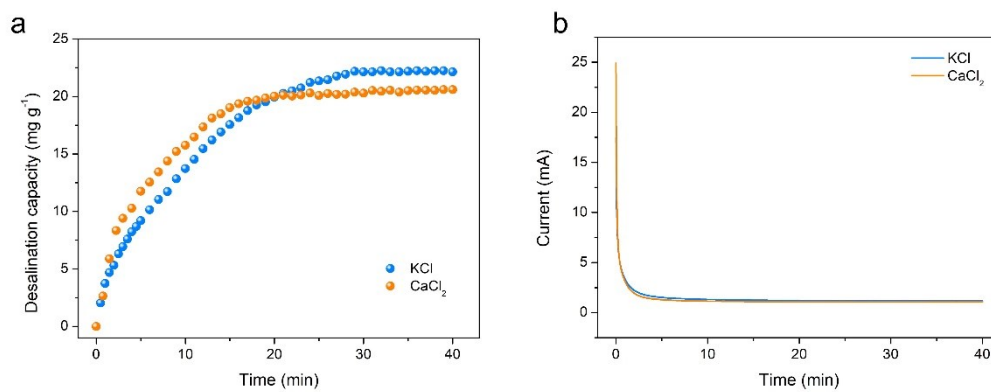

Fig. S13. (a) Desalination capacity vs. time curves of the NP-EHPC electrode in KCl and CaCl<sub>2</sub> solutions at 1.2 V. (b) Current response curves of the NP-EHPC electrode in 4.28 mM KCl and CaCl<sub>2</sub> solutions at 1.2 V.

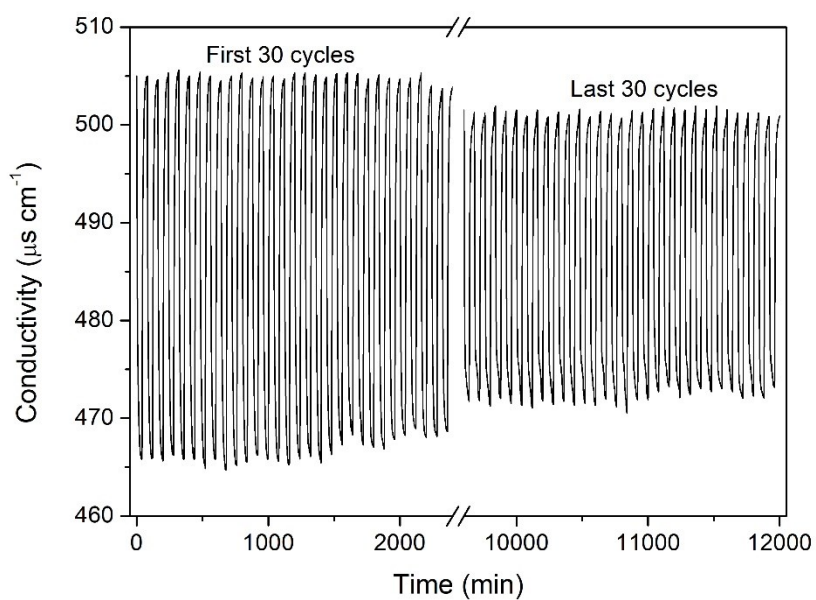

Fig. S14. Regeneration test of the NP-EHPC electrode over 150 cycles in a 250 mg L<sup>-1</sup> NaCl solution at a charge/discharge voltage of 1.2/0 V.

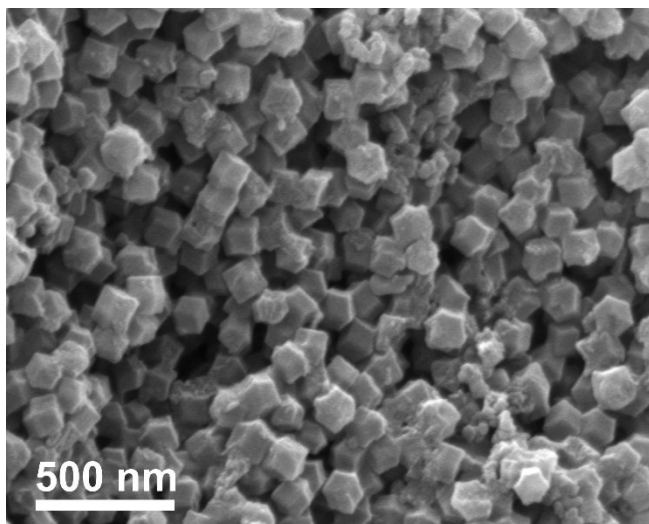

Fig. S15. SEM of NP-EHPC after the 150 regeneration cycles.

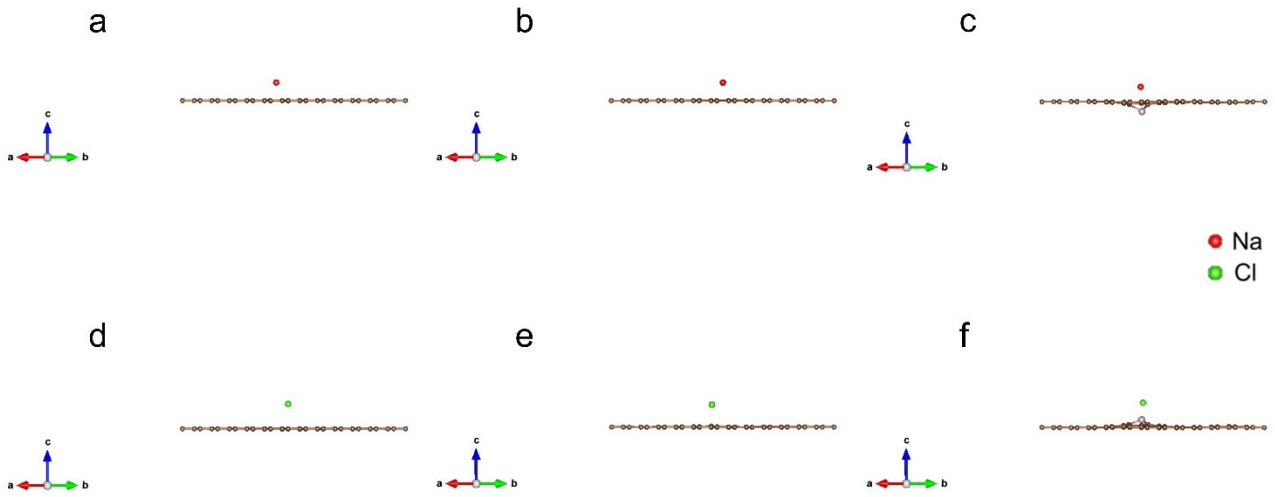

Fig. S16. Side views of Na and Cl atoms adsorbed on (a, d) monolayer graphene, (b, e) N-doped graphene, and (c, f) N, P co-doped graphene.

**Note: Theoretical calculations**

All the calculations were performed using density functional theory (DFT) with the projector augmented plane-wave method, as implemented in the Vienna *ab initio* simulation package.<sup>[15]</sup> The generalized gradient approximation proposed by Perdew, Burke, and Ernzerhof was selected for the exchange-correlation potential.<sup>[16]</sup> The long-range van der Waals interaction is described by the DFT-D3 approach.<sup>[17]</sup> The cut-off energy for plane wave was set to 400 eV. The energy criterion was set to  $10^{-5}$  eV in the iterative solution of the Kohn-Sham equation. The Brillouin zone integration was performed by  $2 \times 2 \times 1$  k-mesh. All the structures were relaxed until the residual forces on the atoms have declined to less than  $0.05 \text{ eV/\AA}$ . Supercells containing  $6 \times 6 \times 1$  unit cell were built to investigate the adsorption of Na and Cl on undoped, N-doped, and N, P co-doped graphene. A vacuum layer of  $15 \text{ \AA}$  was added vertical to the sheet. The adsorption energy is defined as follows,

$$E_a = E_{\text{graphene} + \text{Na/Cl}} - E_{\text{graphene}} - E_{\text{Na/Cl}}$$

where  $E_{\text{graphene} + \text{Na/Cl}}$ ,  $E_{\text{graphene}}$ , and  $E_{\text{Na/Cl}}$  are total energies of undoped/doped graphene with adatom, undoped/doped graphene, and adatom in the bulk or gas, respectively.

## References

- 1 G. Zhu, H. Wang, H. Xu and L. Zhang, *J. Electroanal. Chem.*, 2018, **822**, 81-88.
- 2 N. Pugazhenthiran, S. S. Gupta, A. Prabhath, M. Manikandan, J. R. Swathy, V. K. Raman and T. Pradeep, *ACS Appl. Mater. Interfaces*, 2015, **7**, 20156-20163.
- 3 J. Zhang, J. Fang, J. Han, T. Yan, L. Shi and D. Zhang, *J. Mater. Chem. A*, 2018, **6**, 15245-15252.
- 4 H. Yin, S. Zhao, J. Wan, H. Tang, L. Chang, L. He, H. Zhao, Y. Gao and Z. Tang, *Adv. Mater.*, 2013, **25**, 6270-6276.
- 5 Z. Wang, X. Xu, J. Kim, V. Malgras, R. Mo, C. Li, Y. Lin, H. Tan, J. Tang, L. Pan, Y. Bando, T. Yang and Y. Yamauchi, *Mater. Horiz.*, 2019, **6**, 1433-1437.
- 6 Y. Zhao, G. Luo, L. Zhang, L. Gao, D. Zhang and Z. Fan, *Electrochim. Acta*, 2020, **331**, 135420.
- 7 M. Wang, X. Xu, J. Tang, S. Hou, M. S. A. Hossain, L. Pan and Y. Yamauchi, *Chem. Commun.*, 2017, **53**, 10784-10787.
- 8 W. Dianbudiyanto and S. H. Liu, *Desalination*, 2019, **468**, 114069.
- 9 T. Liu, J. Serrano, J. Elliott, X. Yang, W. Cathcart, Z. Wang, Z. He and G. Liu, *Sci. Adv.*, 2020, **6**, eaaz0906.
- 10 Y. Zhu, G. Zhang, C. Xu and L. Wang, *ACS Appl. Mater. Interfaces*, 2020, **12**, 29706-29716.
- 11 C. C. Hsu, Y. H. Tu, Y. H. Yang, J. A. Wang and C. C. Hu, *Desalination*, 2020, **481**, 114362.
- 12 X. Xu, J. Tang, Y. V. Kaneti, H. Tan, T. Chen, L. Pan, T. Yang, Y. Bando and Y. Yamauchi, *Mater. Horiz.*, 2020, **7**, 1404-1412.
- 13 L. Liu, C. Zhao, F. Zheng, D. Deng, M. A. Anderson and Y. Wang, *Desalination*, 2021, **498**, 114794.
- 14 J. J. Lado, R. L. Zornitta, I. V. Rodríguez, K. M. Barcelos and L. A. M. Ruotolo, *ACS Sustainable Chem. Eng.*, 2019, **7**, 18992-19004.
- 15 G. Kresse and D. Joubert, *Phys. Rev. B*, 1999, **59**, 1758-1775.
- 16 J. P. Perdew, K. Burke and M. Ernzerhof, *Phys. Rev. Lett.*, 1996, **77**, 3865-3868.
- 17 S. Grimme, J. Antony, S. Ehrlich and H. Krieg, *J. Chem. Phys.*, 2010, **132**, 154104.
